# Subject Index

## Amino acid

transport in mouse blastocyst  
compartments: MILLER & SCHULTZ 149

## cAMP

during limb cartilage differentiation  
*in vitro*: GAY & KOSHER 159

## Antibody

tissue specific, used to study mesoderm  
induction in *Xenopus*: DALE, SMITH &  
SLACK 289

## Aphidicolin

effects on DNA replication and  
development of mouse embryos: SMITH &  
JOHNSON 133

## Area centralis

in adult frog after premetamorphic eye  
rotation: DUNLOP & BEAZLEY 159

## Area opaca

of early chick blastoderms – developmental  
potencies: KHANER, MITRANI & EYAL-  
GILADI 235

## Ascidian

egg  
proteins and mRNAs in isolated yellow  
crescents: JEFFERY 275

## Asymmetries

of mouse blastocysts on implantation:  
SMITH 15

## Axis

orientation in mouse embryos: SMITH 15

## Axolotl

egg  
protein synthesis patterns: MEULER &  
MALACINSKI 71  
regeneration  
from isolated half limbs in upper arm:  
WIGMORE & HOLDER 333

## Basement membrane

synthesis in mouse mammary glands by fat  
pad precursor cells: KIMATA, SAKAKURA,  
INAGUMA, KATO & NISHIZUKA 243

## Blastema

monoclonal antibodies to cells of newt  
regenerating limb: KINTNER & BROCKES 37

## Blastocyst

mouse  
amino acid transport in compartments:  
MILLER & SCHULTZ 149

axis orientation – correlation with  
relationship to uterine horn:  
SMITH 15

## Calcium

and neurulation in mammalian embryos:  
SMEDLEY & STANISSTREET 1

## Cartilage

prostaglandin synthesis during limb  
development *in vitro*: GAY & KOSHER 159

## Cell cycle

and compaction in cleaving mouse  
embryos: SMITH & JOHNSON 133

## Cell distribution

in retinal ganglion cell layer of frogs after  
eye rotation: DUNLOP & BEAZLEY 159

## Cell markers

monoclonal antibodies to cells of  
regenerating newt limb: KINTNER &  
BROCKES 37

## Cell movement

in intact and regenerating planarians: SALÓ  
& BAGUÑA 57

## Cell polarity

endocytotic system in mouse  
preimplantation embryos: FLEMING &  
PICKERING 175

## Cell traction

role in chondrogenic condensations in  
developing limb: OSTER, MURRAY &  
MAINI 93

## Characteristics

developmental of protein synthesis during  
urodele embryogenesis: MEULER &  
MALACINSKI 71

## Chick

embryo  
developmental potencies of area opaca  
and marginal zone areas: KHANER,  
MITRANI & EYAL-GILADI 235  
muscle fibre types and innervation after  
cervical spinal cord removal: LAING &  
LAMB 209

## Chimaera

in planarians – study of cell movement in  
regeneration: SALÓ & BAGUÑA 57

## Chondrogenesis

model – role of extracellular matrix and  
cell tractions: OSTER, MURRAY & MAINI 93  
prostaglandin synthesis in chick: GAY &  
KOSHER 159

**Chromosomal**

marker to study cell movement in  
regenerating planarians: SALÓ &  
BAGUÑA 57

**Clinostat**

used to study pattern specification in  
*Xenopus* embryos: NEFF, MALACINSKI &  
CHUNG 259

**Clonal analysis**

of requirement for *trithorax* gene in  
diversification of segments: INGHAM 349

**Compaction**

and DNA replication in cleaving mouse  
embryo: SMITH & JOHNSON 133

**Compound eye**

cellular dynamics of pattern formation in  
*Drosophila*: TOMLINSON 15

**Conceptus**

mouse  
axis orientation – correlation with  
relationship to uterine horn:  
SMITH 15

**Cytoplasmic**

marker to study cell movement in  
regenerating planarians: SALÓ &  
BAGUÑA 57

**DNA replication**

and compaction in cleaving mouse  
embryos: SMITH & JOHNSON 133

***Drosophila melanogaster***

eye  
cellular dynamics of pattern formation:  
TOMLINSON 313  
*trithorax* genes  
clonal analysis of requirement in  
diversification of segments:  
INGHAM 349

***Dugesia* sp. (See Planaria)****Electron microscopy**

of pattern formation in eye of *Drosophila*:  
TOMLINSON 15

**Endocytosis**

in mouse preimplantation embryos:  
FLEMING & PICKERING 175

**Endosomes**

in mouse preimplantation embryos:  
FLEMING & PICKERING 175

**Extracellular matrix**

role in chondrogenic condensations in  
developing limb: OSTER, MURRAY &  
MAINI 93

**Eye**

cellular dynamics of pattern formation in  
*Drosophila*: TOMLINSON 15

**rotation**

cell distributions in retinal ganglion cell  
layer of frogs: DUNLOP & BEAZLEY 159

**Fate map**

for axis orientation in mouse conceptus:  
SMITH 15

**Fat pad**

precursor cells – synthesis of mouse  
mammary gland basement membrane:  
KIMATA, SAKAKURA, INAGUMA, KATO &  
NISHIZUKA 243

**Fibre**

interactions during regeneration of  
*Xenopus* optic nerves: TAYLOR & GAZE 383

**Frog**

cell distribution in retinal ganglion after  
eye rotation: DUNLOP & BEAZLEY 159

**Gradients**

in mesoderm induction in *Xenopus*: DALE,  
SMITH & SLACK 289

**Graft**

regeneration from isolated half limbs of  
axolotl: WIGMORE & HOLDER 333

**Gravity**

simulation used to study pattern  
specification in *Xenopus* embryos: NEFF,  
MALACINSKI & CHUNG 259

***Heleioporus eyrei***

cell distribution in retinal ganglion after  
eye rotation: DUNLOP & BEAZLEY 159

**Homoeotic transformation**

role of *trithorax* gene in segment  
diversification in *Drosophila*:  
INGHAM 349

**Hypoblast**

of early chick blastoderms – developmental  
potencies: KHANER, MITRANI & EYAL-  
GILADI 235

**Induction**

developmental potencies of chick area  
opaca and marginal zone: KHANER,  
MITRANI & EYAL-GILADI 235  
of mesoderm in *Xenopus laevis*: DALE, SMITH  
& SLACK 289

**Innervation**

and muscle fibre types in chick after spinal  
cord removal: LAING & LAMB 209

**Keratan sulphate**

mesoderm induction in *Xenopus*: DALE,  
SMITH & SLACK 289

**Keratin**

mesoderm induction in *Xenopus*: DALE,  
SMITH & SLACK 289

**Kinetics**

of amino acid transport in mouse blastocyst  
compartments: MILLER & SCHULTZ 209

**Laminin**

in developing mouse mammary gland:  
KIMATA, SAKAKURA, INAGUMA, KATO &  
NISHIZUKA 243

**Limb**

development in chick—prostaglandin  
synthesis: GAY & KOSHER 159  
model for chondrogenic condensations:  
OSTER, MURRAY & MAINI 93  
regeneration in upper arm of the axolotl:  
WIGMORE & HOLDER 333

***Limnodynastes dorsalis***

cell distribution in retinal ganglion after  
eye rotation: DUNLOP & BEAZLEY 159

**Lineage labelling**

to study mesoderm induction in *Xenopus*  
*laevis*: DALE, SMITH & SLACK 289

**Lysosomes**

in mouse preimplantation embryos:  
FLEMING & PICKERING 175

**Mammary gland**

mouse, synthesis of basement membrane  
by fat pad precursor cells: KIMATA,  
SAKAKURA, INAGUMA, KATO &  
NISHIZUKA 243

**Marginal zone**

of early chick blastoderms – developmental  
potencies: KHANER, MITRANI & EYAL-  
GILADI 235

**Markers**

chromosomal, nuclear and cytoplasmic in  
regenerating planarians: SALÓ &  
BAGUÑÀ 57

**Mesenchyme**

participation in the developing mouse  
mammary gland: KIMATA, SAKAKURA,  
INAGUMA, KATO & NISHIZUKA 243

**Mesoderm**

induction—studied with cell lineage label  
and antibodies: DALE, SMITH & SLACK 289

**Methionine**

uptake in mouse blastocyst compartments:  
MILLER & SCHULTZ 149

**Model**

for chondrogenic condensations in the  
developing limb: OSTER, MURRAY &  
MAINI 93

**Monoclonal antibodies**

to cells of a regenerating newt limb:  
KINTNER & BROCKES 37

**Motoneurons**

in chick after cervical spinal cord removal:  
LAING & LAMB 209

**Mouse****embryo**

expression of the *Tcp-1* locus: SÁNCHEZ &  
ERICKSON 113

amino acid transport in blastocyst  
compartments: MILLER & SCHULTZ 149

axis orientation – correlation with  
relationship to uterine horn:  
SMITH 15

DNA replication and compaction: SMITH  
& JOHNSON 133

endocytotic system in outside  
blastomeres: FLEMING & PICKERING 175

utilization of cytoplasmic poly(A)<sup>+</sup>RNA  
for protein synthesis: KIDDER &  
CONLON 223

**mammary gland**

synthesis of basement membrane by fat  
pad precursor cells: KIMATA, SAKAKURA,  
INAGUMA, KATO & NISHIZUKA 243

**spermatogenesis**

*Tcp-1* gene products: SANCHEZ,  
HAMMERBERG & ERICKSON 123

**Muscle**

fibre types and innervation after spinal  
cord removal in chick: LAING & LAMB 209

regeneration in upper arm of the axolotl:  
WIGMORE & HOLDER 333

**Mutation**

*trithorax* – role in diversification of  
segments in *Drosophila*: INGHAM 349

**Myoplasm**

proteins and mRNAs in isolated ascidian  
yellow crescents: JEFFERY 275

**Neural tube**

malformations – role of calcium: SMEDLEY &  
STANISSTREET 1

**Neurulation**

and calcium in mammalian embryos:  
SMEDLEY & STANISSTREET 1

**Newt**

monoclonal antibodies to cells of a  
regenerating limb: KINTNER & BROCKES 37

***Notophthalmus viridescens***

monoclonal antibodies to cells of a  
regenerating limb: KINTNER & BROCKES 37

**Nuclear**

marker to study cell movement in  
regenerating planarians: SALÓ &  
BAGUÑÀ 57

**Oocyte***Xenopus laevis*

protein synthesis patterns: MEULER &amp; MALACINSKI 71

**Optic nerve**effect of fibre environment on paths taken  
by regenerating fibres: TAYLOR & GAZE 383**Pattern**formation in eye of *Drosophila*:

TOMLINSON 313

in regeneration from isolated half limbs of axolotl: WIGMORE &amp; HOLDER 333

specification in *Xenopus* – studied with microgravity simulation: NEFF, MALACINSKI & CHUNG 259**Patterns**

of protein synthesis during embryogenesis of urodeles: MEULER &amp; MALACINSKI 71

**Planaria**

cell movement in intact and regenerating chimaeras: SALÓ &amp; BAGUÑA 57

**Polarity**dorsal/ventral in *Xenopus* embryos: NEFF, MALACINSKI & CHUNG 259**Polarization**

DNA replication and compaction in cleaving mouse embryos: SMITH &amp; JOHNSON 133

**Postmeiotic**expression of the *Tcp-1* locus of the mouse: SÁNCHEZ & ERICKSON 113**Preimplantation**mouse embryo, expression of *Tcp-1* locus: SÁNCHEZ & ERICKSON 113**Primary axis**

orientation in mouse embryos: SMITH 15

**Prostaglandin**

synthesis during chick limb cartilage differentiation: GAY &amp; KOSHER 159

**Protein**

synthesis in mouse preimplantation embryos: SÁNCHEZ &amp; ERICKSON 113

synthesis patterns in early embryogenesis of urodeles: MEULER &amp; MALACINSKI 71

synthesis in preimplantation mouse embryos: KIDDER &amp; CONLON 223

synthesis in *Tcp-1* mutants of mouse during spermatogenesis: SÁNCHEZ, HAMMERBERG & ERICKSON 123**Proteoglycan sulphate**

in developing mouse mammary gland: KIMATA, SAKAKURA, INAGUMA, KATO &amp; NISHIZUKA 243

**Rat**

embryo

calcium and neurulation: SMEDLEY &amp; STANISSTREET 1

**Regeneration**

cell movement in planarians: SALÓ &amp; BAGUÑA 57

from isolated half limbs in upper arm of axolotl: WIGMORE &amp; HOLDER 333

in newt limb – studied with monoclonal antibodies: KINTNER &amp; BROCKES 37

of optic nerves in *Xenopus*: TAYLOR & GAZE 383**Regional markers**to study mesoderm induction in *Xenopus laevis*: DALE, SMITH & SLACK 289**Ribonucleoprotein**

in preimplantation mouse embryos: KIDDER &amp; CONLON 223

**mRibosenucleic acid (mRNA)**

in ascidian yellow crescents: JEFFERY 275

utilization for protein synthesis in preimplantation mouse embryos: KIDDER &amp; CONLON 223

**Scanning electron microscopy**

of neurulation in mammalian embryos: SMEDLEY &amp; STANISSTREET 1

**Schwann cells**

as origin of blastemal cells in newt regenerating limb: KINTNER &amp; BROCKES 37

**Segment**diversification in *Drosophila* – role of the *trithorax* gene: INGHAM 349**Specification**mesoderm induction in *Xenopus*: DALE, SMITH & SLACK 289**Spermatogenesis**expression of the *Tcp-1* locus of the mouse: SÁNCHEZ & ERICKSON 113in mouse *Tcp-1* mutants: SÁNCHEZ, HAMMERBERG & ERICKSON 123**Spinal cord**

transection in chick embryo – effects on muscle innervation: LAING &amp; LAMB 209

**Styela**

egg

proteins and mRNAs in isolated yellow crescents: JEFFERY 275

**Subribosomal**

RNP in preimplantation mouse embryos: KIDDER &amp; CONLON 223

**Symmetry**in eye of *Drosophila*: TOMLINSON 15

**t-alleles**

protein synthesized in *Tcp-1* mouse during spermatogenesis: SÁNCHEZ, HAMMERBERG & ERICKSON 123

***Tcp-1* locus**

expression in mouse during early embryogenesis: SÁNCHEZ & ERICKSON 113

**Totipotency**

in development of early chick blastoderm: KHANER, MITRANI & EYAL-GILADI 235

**Transmission ratio distortion**

in *Tcp-1* mutants of mouse: SÁNCHEZ, HAMMERBERG & ERICKSON 123

***Trithorax***

gene in *Drosophila* – role in diversification of segments: INGHAM 349

**Two-dimensional (2D)**

gel electrophoresis of proteins in mouse preimplantation embryos: SÁNCHEZ & ERICKSON 113

gel electrophoresis of proteins in embryogenesis of axolotls: MEULER & MALACINSKI 71

**Ultrastructure**

of endocytotic system in mouse preimplantation embryos: FLEMING & PICKERING 175

**Uterine**

orientation in mouse embryos: SMITH 15

**Visual streak**

in adult frog after premetamorphic eye rotation: DUNLOP & BEAZLEY 159

***Xenopus laevis***

effects of fibre environment on regenerating optic nerves: TAYLOR & GAZE 383

**egg**

protein synthesis patterns: MEULER & MALACINSKI 71

**embryo**

mesoderm induction – studied with cell lineage label and antibodies: DALE, SMITH & SLACK 289

pattern specification in – studied with microgravity simulation: NEFF, MALACINSKI & CHUNG 259

**Yellow crescent**

of ascidian eggs – proteins and mRNA identification: JEFFERY 275
